# Supplementary material for: TiO2, SiO2 and ZrO2 Nanoparticles Synergistically Provoke Cellular Oxidative Damage in Freshwater Microalgae
Source: PubMed Central journal article supplement (PMC5853726; doi:10.3390/nano8020095), 2018-02-08
Supplement: nanomaterials-08-00095-s001.pdf [file nanomaterials-08-00095-s001.pdf]

## Supplementary Materials

# TiO<sub>2</sub>, SiO<sub>2</sub> and ZrO<sub>2</sub> Nanoparticles Synergistically Provoke Cellular Oxidative Damage in Freshwater Microalgae

Yinghan Liu <sup>1</sup>, Se Wang <sup>1,\*</sup>, Zhuang Wang <sup>1,\*</sup>, Nan Ye <sup>1</sup>, Hao Fang <sup>1</sup> and Degao Wang <sup>2</sup>

<sup>1</sup> Collaborative Innovation Center of Atmospheric Environment and Equipment Technology, School of Environmental Science and Engineering, Nanjing University of Information Science and Technology, Nanjing 210044, China; yinghan\_liu@163.com (Y.L.); yenan\_nuist@163.com (N.Y.); fh@nuist.edu.cn (H.F)

<sup>2</sup> School of Environmental Science and Technology, Dalian Maritime University, Dalian 116023, China; degaowang@163.com

\* Correspondence: wangse@nuist.edu.cn (S.W.); zhuang.wang@nuist.edu.cn (Z.W.);  
Tel./Fax: +86-25-58731090 (S.W. and Z.W.)

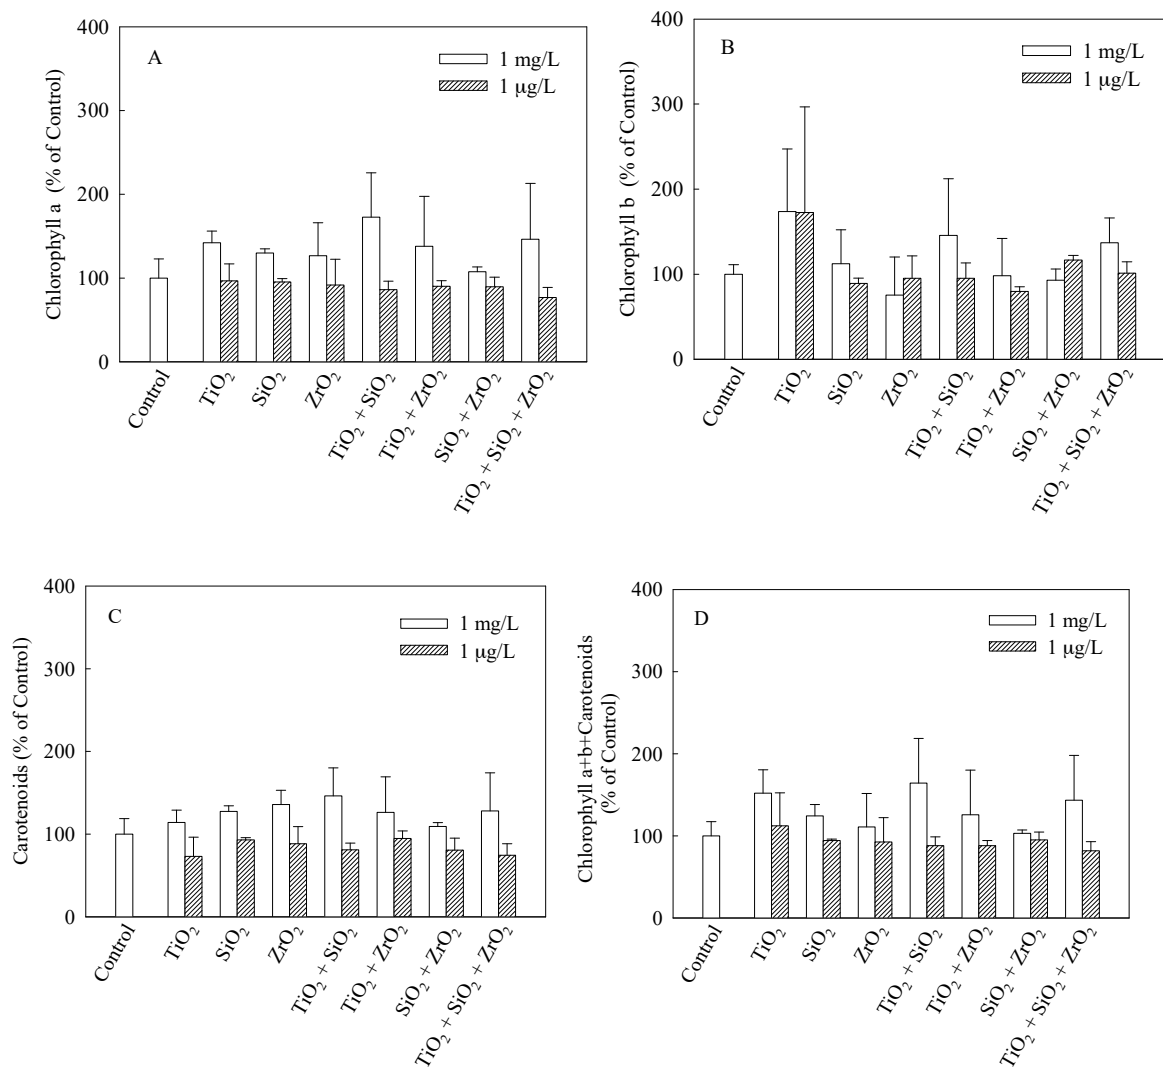

**Figure S1.** Relative levels of chlorophyll a (A); chlorophyll b (B); carotenoids (C) and the total content of chlorophyll and carotenoids (D) in *S. obliquus* exposed to 1 mg/L and 1 µg/L of NPs alone, 1 mg/L and 1 µg/L of single NPs in binary combination, and 1 mg/L and 1 µg/L of single NPs in ternary combination.

In the present study, chlorophyll contents were determined using the following empirical equations [S1]:

$$C_A = 12.21OD_{663} - 2.81OD_{645} \quad (1)$$

$$C_B = 20.13OD_{645} - 5.03OD_{663} \quad (2)$$

$$C_K = (1000OD_{470} - 3.27C_A - 104C_B)/229 \quad (3)$$

where  $C_A$  is the content of chlorophyll a,  $C_B$  the content of chlorophyll b, and  $C_K$  is the content of carotenoids [S2].

## References

[S1] Wellburn, A.R.; Lichtenthaler, H. Formulae and program to determine total carotenoids and chlorophylls A and B of leaf extracts in different solvents. In: *Sybesma C. Advances in photosynthesis research. Advances in agricultural biotechnology*, Springer, Dordrecht, **1984**, 2.

[S2] Li, X.; Ping, X.; Xiumei, S.; Zhenbin, W.; Liqiang, X. Toxicity of cypermethrin on growth, pigments, and superoxide dismutase of *Scenedesmus obliquus*. *Ecotoxicol. Environ. Saf.* **2005**, *60*, 188–192.
